# Supplementary material
Source: PubMed Central journal article supplement (PMC4196747)
Supplement: ct500305u_si_001.pdf [file ct500305u_si_001.pdf]

**Acceleration of Lateral Equilibration in Mixed Lipid Bilayers  
Using Replica Exchange with Solute Tempering  
Supporting Information**

Kun Huang\*

*Department of Physics, Applied Physics and Astronomy,  
Rensselaer Polytechnic Institute Troy NY 12180 USA*

Angel E. García<sup>†</sup>

*Department of Physics, Applied Physics and Astronomy,  
and Center for Biotechnology and Interdisciplinary studies,  
Rensselaer Polytechnic Institute Troy NY 12180 USA*

(Dated: August 28, 2014)

## FIGURE LEGENDS

Figure S1: Lateral radial distribution (rdf) function of CHOL-DPPC center of mass distances calculated from the REST and MD simulations.

Figure S2: Lateral radial distribution (rdf) function of DPPC-DPPC center of mass distances calculated from the REST and MD simulations.

Figure S3: Deuterium order parameters  $|S_{cd}|$  of DPPC palmitoyl chains calculated from the REST simulation at various solute temperatures ( $\beta_m$ ).

---

\* huangk4@rpi.edu

† angel@rpi.edu

CHOL-DPPC

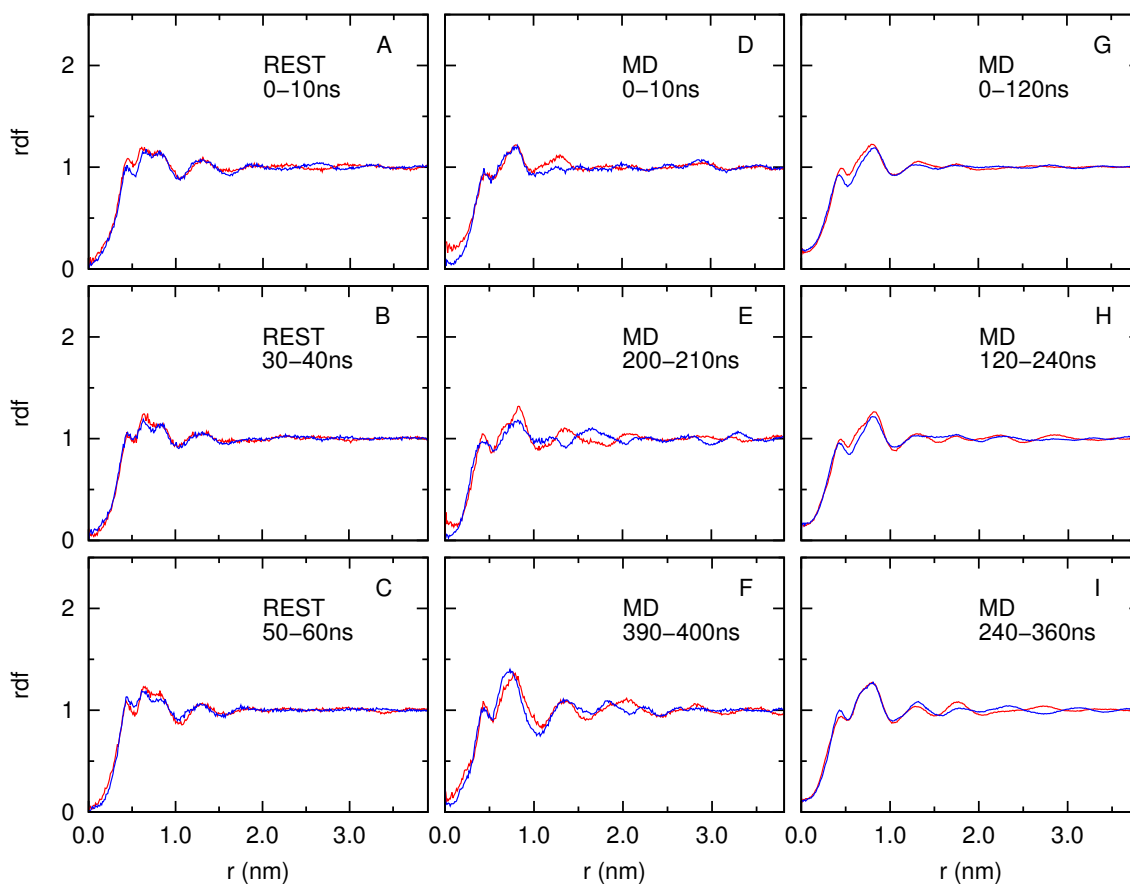

FIG. S1.

DPPC-DPPC

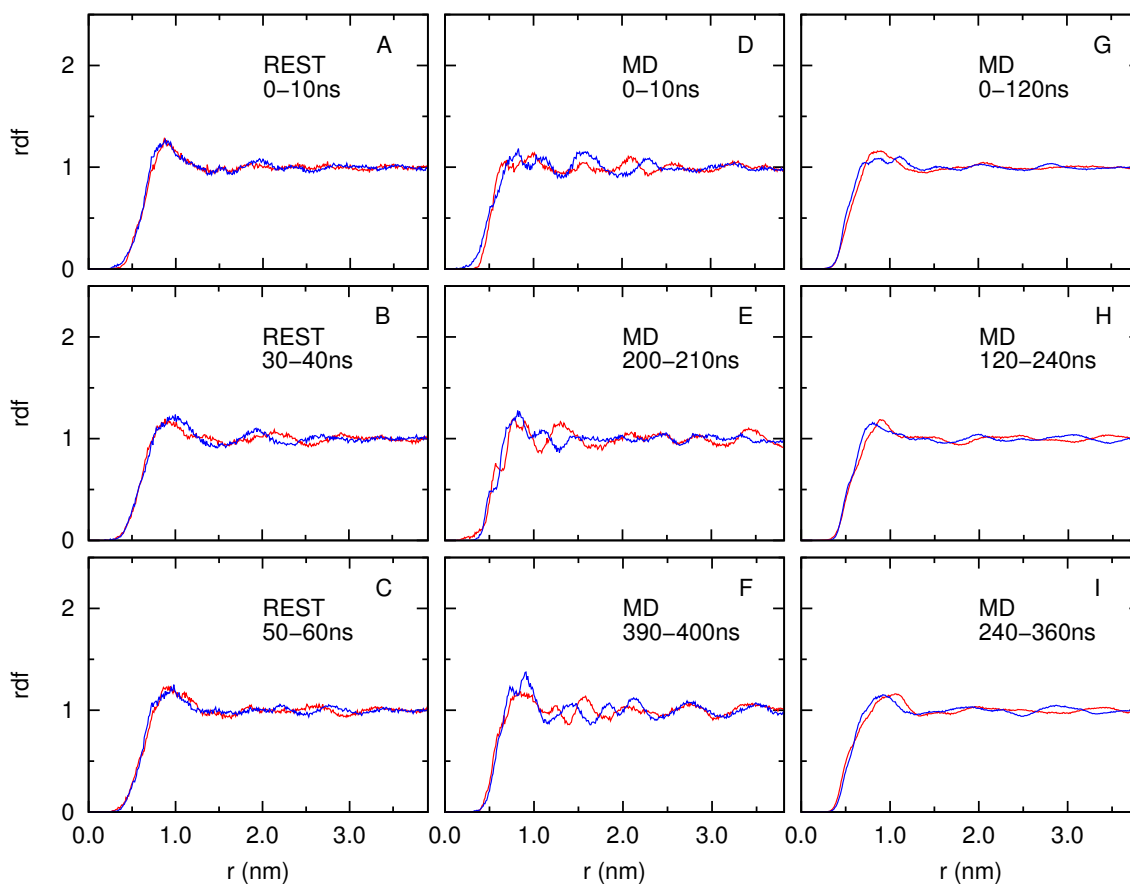

FIG. S2.

323 K + 360 K \* 400 K + 445 K ● 500 K ▲ 564 K ▼  
 341 K x 380 K □ 421 K ○ 471 K △ 531 K ▽ 600 K ◇

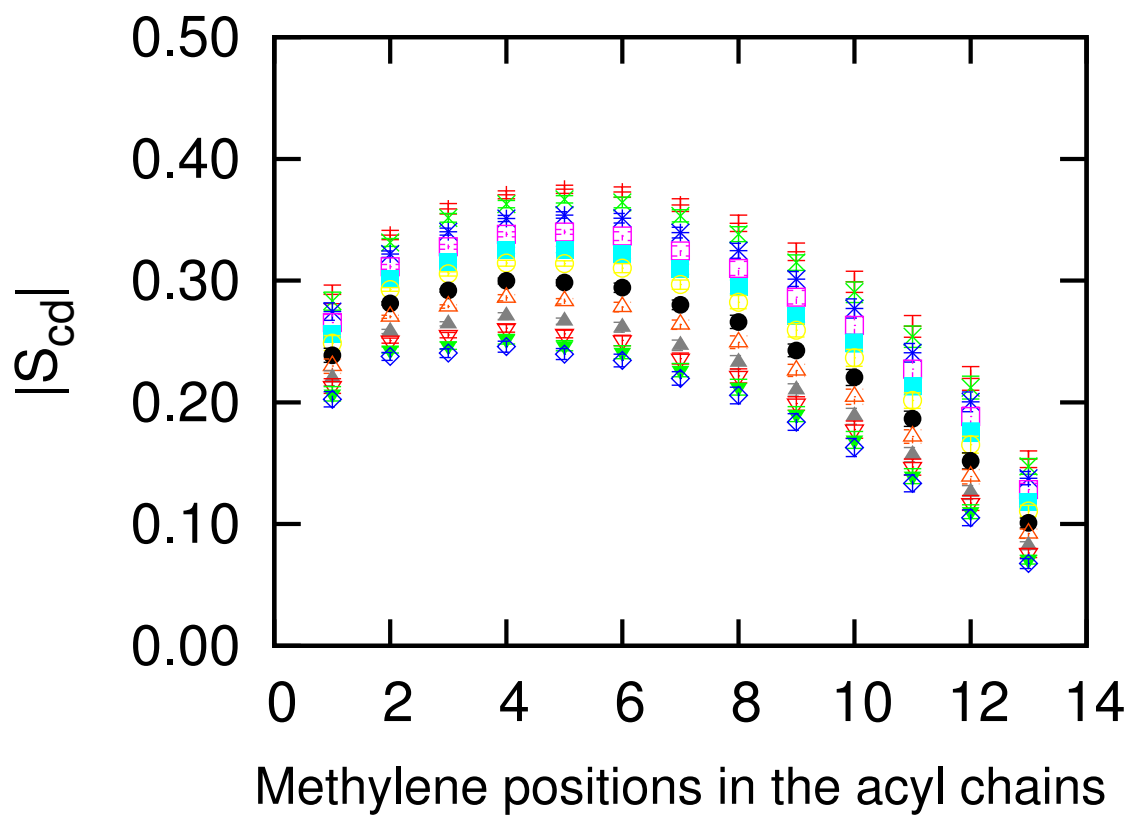

FIG. S3.
